# Supplementary material for: Stochastic alluvial fan and terrace formation triggered by a high-magnitude Holocene landslide in the Klados Gorge, Crete
Source: Copernicus journal article supplement (doi:10.5194/esurf-2021-4), 2021-02-10
Supplement: Supplementary file [file esurf-2021-4-AC3-supplement.pdf]

## Response to J. Begg, V. Mouslopoulou, D. Moraetis

### COMMENTS ON Bruni et al. 2021

J. Begg, V. Mouslopoulou, D. Moraetis

6 April 2021

We are the principal authors of Mouslopoulou et al. (2017), the conclusions of which are challenged by this submission.

The Domata/Klados River area is a beautiful and under-appreciated area of Crete and this manuscript by Bruni et al. discusses the relationship between a large landslide event and deposition within a confined catchment on the southern side of the island. We believe that while the significance of the landslide event in the headwaters of the Klados River is credible, as are some of the deductions that they have made regarding its impact on deposition through the catchment, there are important elements within this manuscript that are not as straightforward as the authors have presented. We will explore some of these issues in the comments below.

1. The authors claim that the alluvial deposits beneath the surface T<sub>2</sub> post-date a regional-scale earthquake in AD365 that uplifted the coastline at Klados by c. 6 m. If this is true, most of the conclusions of this work are correct. If not, however, many of their conclusions are demonstrably wrong. Thus, the authors, in our view, should have taken special care to demonstrate solidly this relationship. Below we show that they have not.

We thank the reviewers for this comment. As pointed out in a [reply to Mouslopoulou et al. \(2017\)](#) by two of the authors of this manuscript (Gallen and Wegmann), what we call the T<sub>2</sub> fan forms a buttress unconformity with the late Holocene erosional notch. This was clearly shown in figures in that 2017-comment and is shown again in this manuscript, along with additional supporting information. This observation demands that deposition of the T<sub>2</sub> fan post-dates uplift of the late Holocene notch. This primary observation of a simple cross-cutting relationship is not in question and is definitive evidence that the T<sub>2</sub> fan is late Holocene in age. This relationship is even shown in Figure 6b of Mouslopoulou et al. (2017).

We added new photos and enlarged photos to more clearly show the cross-cutting relationship to the revised manuscript. We thank the reviewer for this request as it strengthens the presentation of our study.

The relationship between the alluvial deposits underlying surface T<sub>2</sub> and the AD365 “tidal notch” is not clearly presented. The authors in lines 233-234, 289-290 (and elsewhere) repeatedly claim that the AD365 “tidal notch” is overlain by alluvial deposits underlying terrace T<sub>2</sub>. However, neither Figure 4h nor 4i show this. Instead, these figures show the 365 AD tidal notch preserved on limestone bedrock (Fig. 4h) but missing from nearby gravels (Fig. 4h and 4i).

As noted above, we have revised the presentation of the basic field observations (see Fig. 5). However, the reviewers make a confusing comment here about the notch missing from the gravels. Yes, the notch is in the limestone bedrock and continues behind the T<sub>2</sub> alluvial gravels

(this is a buttress unconformity); this is the entire point of showing the figure.

We cannot be certain, but the reviewers seem to imply that the lack of preservation of a tidal erosion notch in the fan is somehow damaging to our arguments, which is entirely wrong. The notch is not observed in the gravels because the fan is younger than the notch. Also, the fan is highly erodible and unlikely to preserve a notch even if it did exist. Hence our confusion.

Alternatively, perhaps what the reviewers meant by this comment was that the notch formed at the front of the fan deposits coeval with its formation across the limestone headlands on either side of the Klados Gorge, and now is eroded away due to back-wasting of the  $T_2$  alluvial gravel deposits by wave and gravitational action. This is a possible scenario if  $T_2$  fan formation was Pleistocene; however, we show through stratigraphic observations (e.g., the existence of a buttress unconformity between the limestone headland that includes the late Holocene notch with Vermetid gastropod encrustations) and the existence of a late Holocene paleo beach deposit that is buried by the younger  $T_2$  alluvial deposits, that this hypothesis is not supported by available stratigraphic information. We have included a new figure that clearly shows these observations.

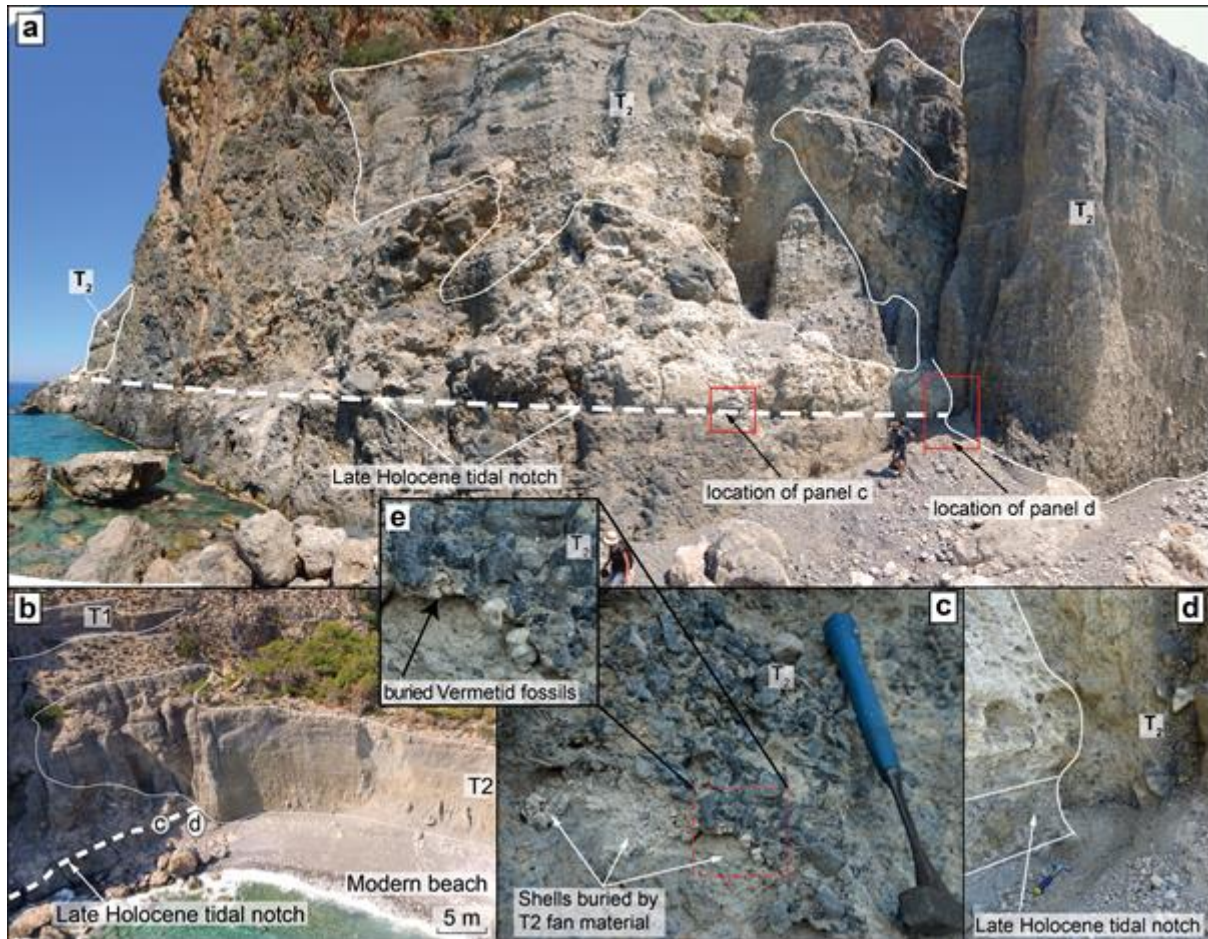

**Figure 5:** The contacts between the tidal notch,  $T_2$ , and the paleobeach are illustrated by photographs from the west side of the study area. (a) Overview showing the unconformable relationship of the Late Holocene tidal notch and the  $T_2$  fan highlighting the location of figures in other panels. (b) Oblique aerial perspective view of the outcrop with the

major features highlighted. (c) Detail of the Vermetid extraction site shows how gravels of T<sub>2</sub> overlie a Vermetid shell pocket in the tidal notch. (d) Detail of the contact zone between the carbonaceous bedrock, T<sub>2</sub>, and the tidal notch (partly buried by colluvium). (e) The Vermetid fossil pocket is covered by T<sub>2</sub> fan material (detail of (c)).

The “tidal notch” is not a deposit, it is a geomorphological feature, the result of local modification of the bedrock, here limestone, by marginal marine processes. The limestone is well lithified while the alluvial gravels are “unconsolidated” (see Section 4.3) and both lie at the inland extent of today’s active beach. There is no discussion of the potential for these active marginal marine processes to erode these two lithologies differently. Would the AD365 “tidal notch”, even if it had been present on the alluvial gravels (should they really be older), have been preserved? Why do they authors fail to consider this alternative scenario? The images presented do not identify the contact between limestone bedrock and “T<sub>2</sub> deposits” (and therefore the relationship). Further, the cliff on the right-hand side of Fig. 4i comprises T<sub>2</sub> alluvial materials and doesn’t show the “tidal notch”, but that does not mean that it wasn’t once there before erosion by active marginal marine processes. This point is critical to the arguments that “T<sub>2</sub> infill deposits” (all 20 m of them) post-date the AD365 uplift event that is asserted in the rest of the paper.

We are aware that the notch is not a depositional feature and we do not state otherwise in the manuscript. We also recognize that the erodibility of the bedrock limestone and fan deposits are different. However, the fact that the T<sub>2</sub> fan covers the notch indicates that the T<sub>2</sub> deposit is younger than the notch. This is a basic cross-cutting relationship regardless of differences in erodibility and “marine trimming”. We note that we are not the first scientists to make this basic observation. Booth (2010) conducted a detailed study of several coastal catchments in southern Crete with a particular emphasis on the Klados catchment. In this study, they independently report the same observation; the T<sub>2</sub> fan covers the notch, thus this buttress unconformity demands that the deposition of the T<sub>2</sub> fan postdates the late Holocene uplift of this paleoshoreline.

As noted above, we made revisions to the presentation of the figures to better illustrate this cross-cutting relationship.

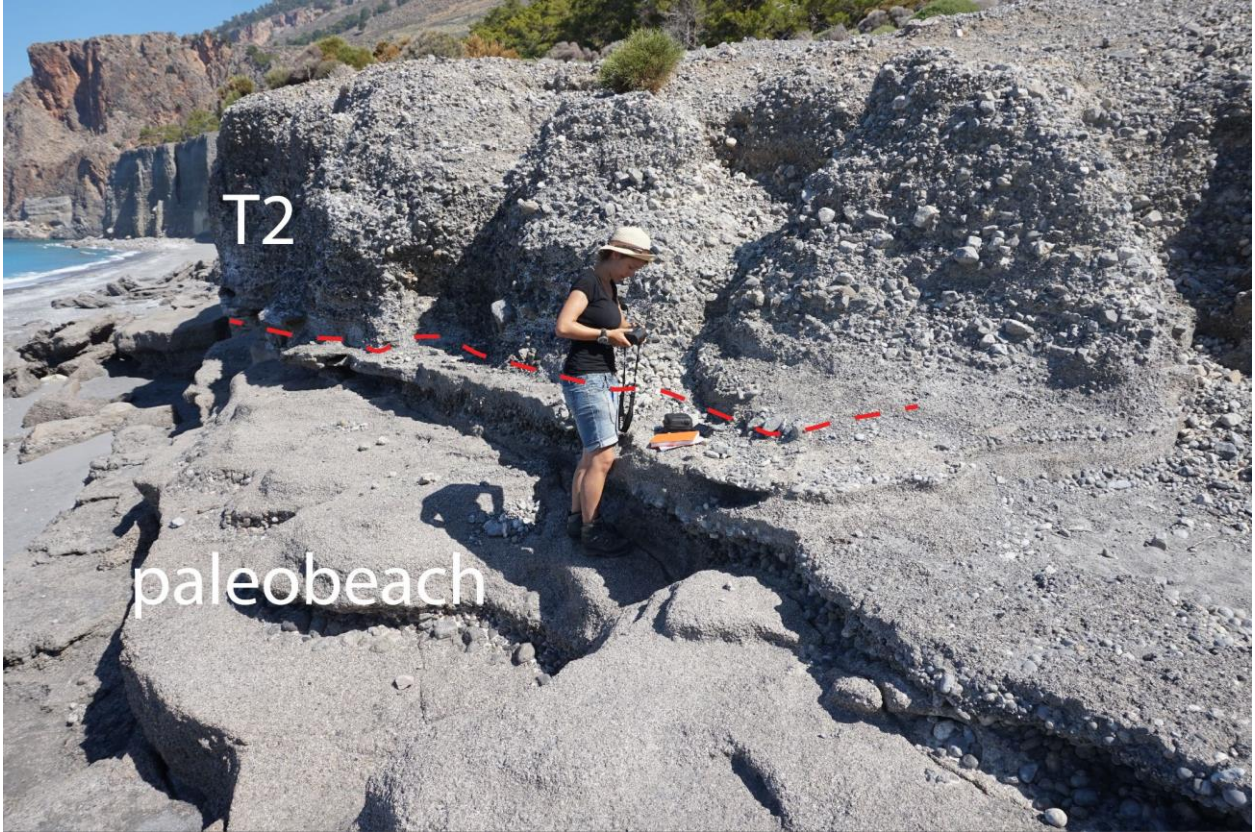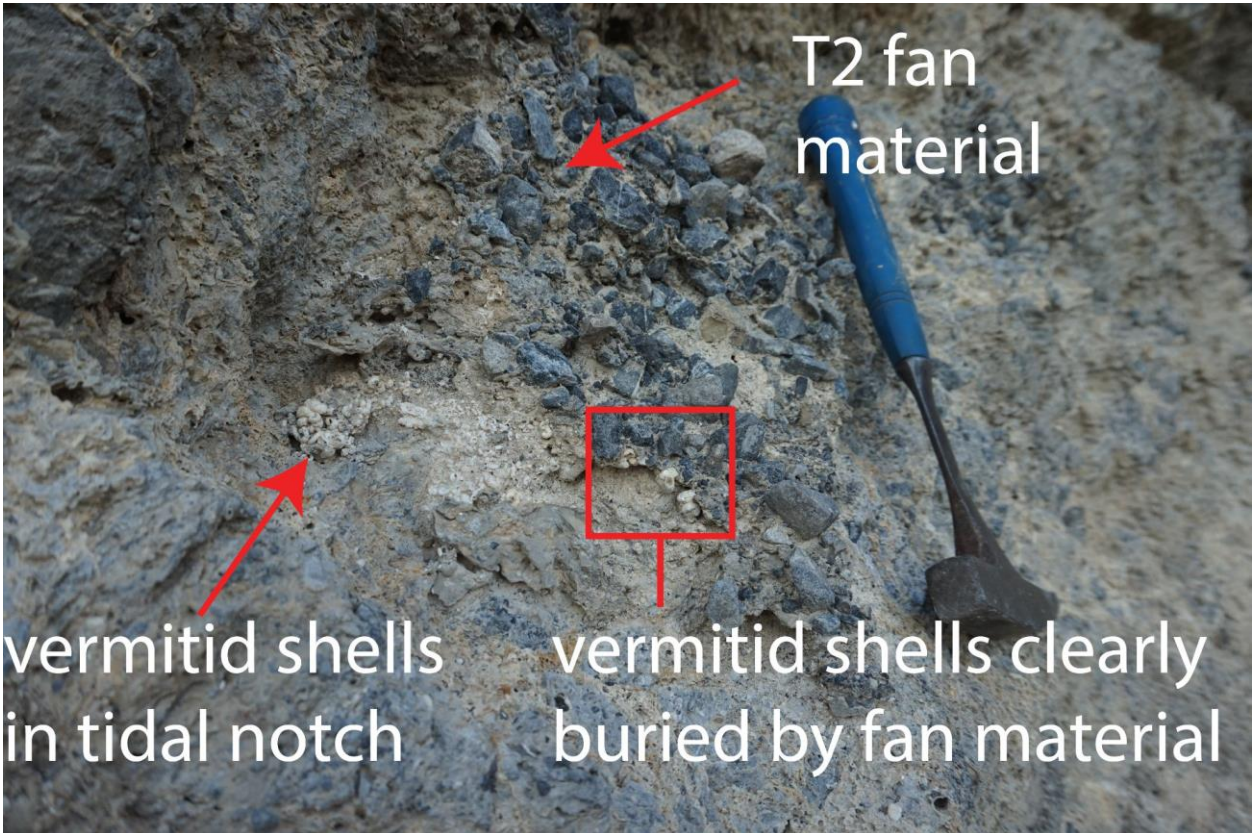

Further, if the authors' interpretation above is correct: 1) the deposition of the "T2 infill deposits", 2) erosion of the lower coastal cliff and 3) incision by the Klados River below the T2 surface is required to have occurred after the AD365 earthquake. In such a scenario, the speed of deposition of the "T2 infill deposits" and their incision (by sea and river) to their present day configurations must have been exceptionally fast, with only 1600 years available to complete. Given the small catchment area and limited water flow, these events are less likely.

Yes, this is the entire point of the study and why it is so interesting. Considering the observation of the valley filling landslide deposit that is highly erodible (a critical observation missed in (Mouslopoulou et al., 2017), this scenario is credible, likely and indeed demanded by basic cross-cutting stratigraphic field relationships. It shows how such a small catchment in the aftermath of a large sediment pulse can become ultra-sensitive to external perturbations, e.g. storms and earthquake sediment mobilization that rapidly aggrade and incise the deposits. **The significance of this study is to show that thick sequences of alluvial deposits can form in a very limited time in the aftermath of a sediment pulse, contrary to the traditional interpretation of tectonic and climatic forcing.**

It is worth highlighting that there is a growing body of literature that shows these "stochastic" events and associated rapid development of thick alluvial deposits are more common than previously recognized and have often been inappropriately interpreted as the result of long-term climate change. We invite the comment authors to read Scherler et al. (2016), which shows how a sequence of river terraces traditionally assumed to be linked to the early to mid-Pleistocene variations in climate, turned out to be due to a Holocene landslide. The study shows aggradation and incision of a similar number of terraces with similar terrace thicknesses within the Holocene in the semi-arid landscape of California. We also point the reviewers to the excellent work of Schwanghart et al. (2016) and Stolle et al. (2017) that show large alluvial infill deposits in the Central Himalaya in Nepal are Holocene in age and related to large-scale landslides up-valley.

2. The unexplored problems associated with the "tidal notch" and deposition of the "T2 infill deposits" discussed above, are compounded by using their interpreted relationship to assume that the "paleobeach" deposit underlying "T2 infill deposits" must represent the AD365 shoreline. This is unproven. Instead, this correlation is based on the relationship that we questioned in (1) and on the elevation of each of the features. We argue that in our model (see Mouslopoulou et al., 2017) we would expect a "paleobeach" deposit seaward of the base of the marine cliff that truncates T1 – thus, this observation does not contradict an older age of the alluvial fans.

This comment is moot based on the cross-cutting relationships observed between the T<sub>2</sub> fan and notch described in detail above, so we have not made any revisions to address it. Nonetheless, we use this as an opportunity to highlight issues with the interpretations presented in Mouslopoulou et al. (2017) and detail why our inference that this paleobeach represents the 365 AD shoreline is more reasonable given the data.

The stratigraphic observation of the T<sub>2</sub> terrace overlying a paleobeach deposit was missed in the original submission by Mouslopoulou et al. (2017), but highlighted in the [comment](#) by Gallen and Wegmann (2017). In revision of their manuscript, Mouslopoulou et al. (2017) included mention of this paleobeach and suggested that it is Pleistocene in age. However, the authors did not consider the fact that the paleobeach deposit is found at the same elevation as the erosional notch, which would be a remarkable coincidence if it were Pleistocene. If this paleobeach were Pleistocene, the traces of the late Holocene shoreline that is found on both sides of the modern Domata beach would have been completely eroded away in the center of the modern bay with erosion revealing an older Pleistocene paleobeach that is found at the exact same height as the Late Holocene one. Additionally, considering that the T<sub>2</sub> fan covers (buries) both the notch and the beach, it is reasonable and more parsimonious to assume that the notch and paleobeach indeed represent the same paleoshoreline.

During field work we have taken a luminescence sample from the paleobeach. In contrast, to the fan deposits luminescence dating of beach deposits is more promising, because the constant swash of beach material provides better conditions for grain bleaching. However, given the clear field relationship, and the negligible quartz and feldspar content of local rocks, we decided there is no benefit nor need to date this sample. If the reviewers still have any doubt about the Holocene age of this paleobeach after our presentation of additional field pictures with clear cross-cutting relationships, they are welcome to process this sample.

**3.** Reference is made by the authors to the “crisp” similarity in morphology of the two marine cliffs at Klados mouth. More careful examination of this statement shows that this is not true. The 5 m topo DEM that the authors used to derive their data is entirely adequate to contradict this assertion. See below profiles 1 to 3 across the Klados beach that illustrate that the lower sea-cliff is significantly steeper than the upper sea-cliff (75° vs. 53° average slopes). In addition, the base/crest of the lower-cliff is much sharper than those of the upper-cliff. The morphological differences between the two sea-cliffs are indicative of an age difference substantially more than 1600 years. These observations undermine the authors’ assertion that the morphologies are equally immature and therefore both of late Holocene age and provide critical corroborative evidence that the upper sea-cliff is substantially older than the lower sea-cliff.

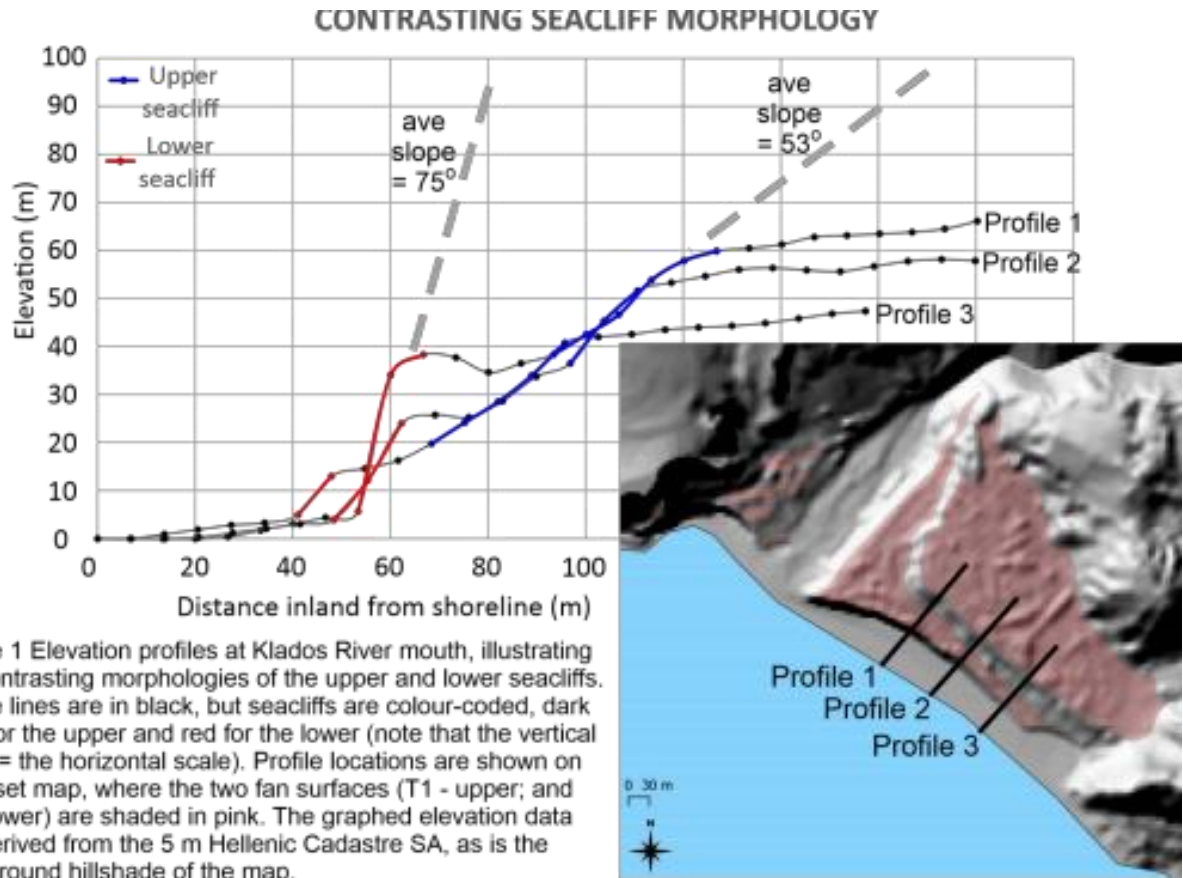

This is an intriguing comment that is very similar to a comment made by [Gallen and Wegmann \(2017\)](#) regarding issues of the interpretations presented in Mouslopoulou et al. (2017). We thank the reviewers for producing this figure, which provides an opportunity to highlight why our interpretations are more favorable than those presented in Mouslopoulou et al. (2017).

First, the figure above selectively chooses the steepest profile of T<sub>2</sub> (in red above, profile 3) to argue that the T<sub>2</sub> sea cliff is steeper. The active sea cliff for T<sub>2</sub> Profiles 1 and 2 have slopes of ~55-60 degree, which is remarkably similar to the slope of the T<sub>1</sub> paleo-sea cliff, supporting our statements in the manuscript that these erosional cliffs are “similarly crisp”. Also see the detailed topographic profile in Figure 5a in Mouslopoulou et al. (2017) for evidence of the similar morphology of these two sea cliffs.

Second, the T<sub>2</sub> sea cliff is actively eroding by wave action during winter storms. As such, we expect that some portions will be oversteepened (profile 3), so this observation is not damaging to our interpretations.

Third, as pointed out in Gallen and Wegmann’s (2017) comment , the similar sharpness of the T<sub>1</sub> and T<sub>2</sub> sea cliffs as shown in the figure above is very problematic for the interpretations presented in Mouslopoulou et al. (2017). Both terraces consist of largely uncemented and unconsolidated granular material. In our interpretation, the T<sub>1</sub> sea cliff is only ~1600 years old, which explains why it maintains a steep angle of 53 degrees, similar to the actively eroding T<sub>2</sub> sea cliff. The

interpretation of Mouslopoulou et al. (2017) suggests the  $T_1$  sea cliff is >30 kyrs older than the active  $T_2$  sea cliff. Considering that these are unconsolidated granular deposits, how does  $T_1$  maintain such sharpness over that duration of time? This presents a problem for the interpretations presented in Mouslopoulou et al. (2017), but is easily explained by our preferred interpretation.

In response to this comment, we produce our own profiles to show the similar sharpness of the sea cliff and elaborate on why this supports the interpretations that  $T_1$  is young (e.g. Holocene). We thank the reviewers for pushing us to more strongly support our interpretations with quantitative analysis of the sea cliff morphology (see supplementary sect. 7, Fig. S6). We are confident that this will be helpful in convincing the reader of their young age.



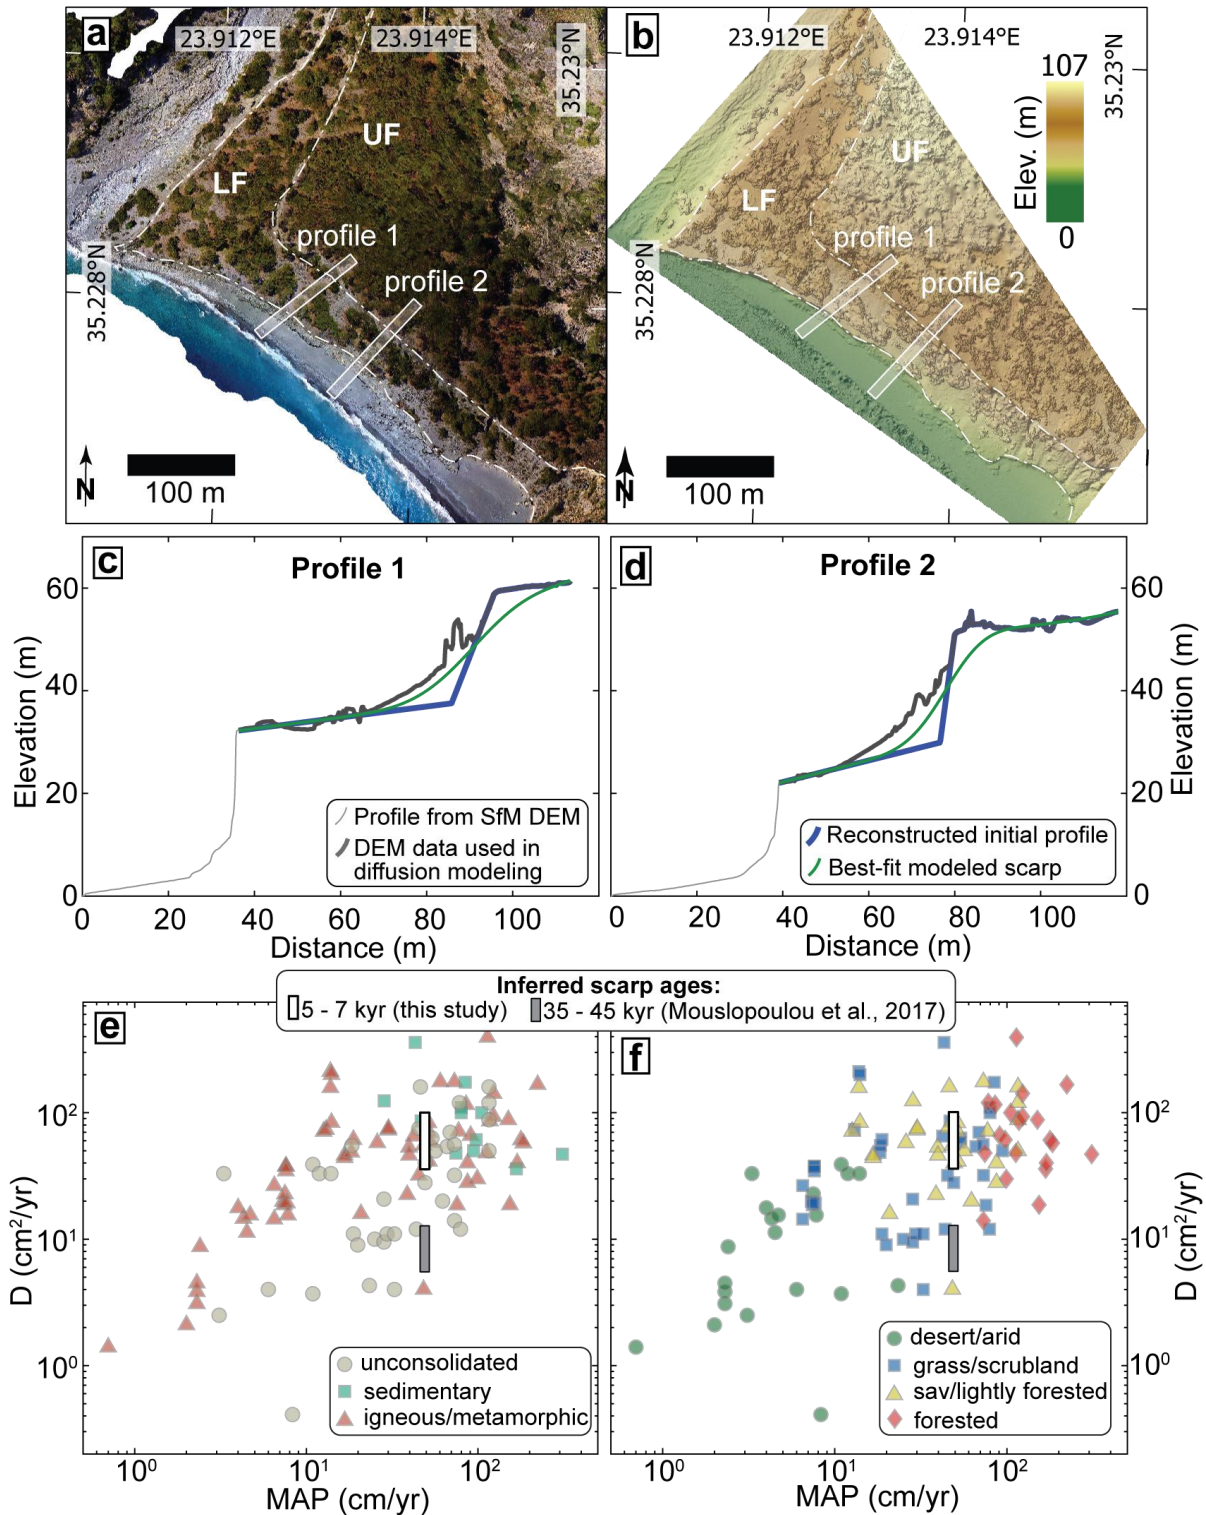

**Figure S6:** Structure from motion (SfM) photomosaic, digital surface model (DSM), and diffusion modelling results. (a) and (b) show the SfM photomosaic and DSM result, respectively, along with the location of the two swath profiles (LF – lower fan, UF – upper fan). (c) and (d) are the minimum elevations of the swath profile (grey lines), which are assumed to approximate the vegetation-free fan morphology. Also shown on both plots is the initial (blue line) and the final modelled (green line) topographic profiles for the upper fan. The bold grey line shows the data used in the

diffusion modelling. (e) and (f) show the best fit diffusion coefficient,  $D$ , results for the Holocene and Pleistocene age models as the white and great vertical rectangles, respectively, plotted against mean annual precipitation (MAP). Also shown is the global compilation of diffusion coefficients from Richardson et al. (2019) classified based on substrate (e) and overlying vegetation (f).

Unit AD in the current manuscript comprises aeolian silty sand and includes terrestrial gastropod shells. The authors argue that the deposition of this unit post-dated abandonment of the T1 surface and this is entirely reasonable. But to assign a depositional age for this unit to the period of incision of T1 gravels (lines 271-274), only because similar aeolian deposits are present around Crete (unreferenced statement), and without proving that they were indeed deposited during this incision phase and prior to deposition of the lower fan gravels, is inappropriate. So dating the gastropod from these aeolian deposits proves little other than that some aeolian silty sand was deposited locally in the late Holocene, necessarily after abandonment of the T1 surface.

This is a fair point and we have made revisions qualifying the results. However, we note that even without this geochronology, the cross-cutting, stratigraphic and geomorphic observables support our interpretation that the deposits in Klados are Holocene and not Pleistocene.

5. This brings us to the authors' preference, in this instance, to believe radiocarbon ages instead of IRSL ages. The authors state that they collected most of the bulk sediment samples from close to terrace surfaces where the materials were accessible. As acknowledged within the text, they all have very low total organic carbon contents, but the origin of the carbon within the samples receives little discussion (Section 4.4) regarding whether it is possible that there may have been contamination from plants (living and dead, surface litter and root systems). These contaminants arguably have the potential for minimizing resulting ages, and even making the ages irrelevant to the timing of events they are designed to investigate. The question-marks regarding the radiocarbon ages presented are at least as compelling as the arguments they use to dismiss the validity of our substantially older IRSL ages. Interestingly, the authors do argue for younger contaminants in their landslide deposits to explain their younger ages (lines 399-400).

The field relationships clearly show that the IRSL results of Mouslopoulou et al. (2017) are unreliable. The T<sub>2</sub> fan forms a buttress unconformity with the Holocene notch, requiring its deposition in the Late Holocene. The IRSL results of this Holocene deposit produce an apparent age of ~40 kyr with significant scatter in the equivalent doses indicating the results are incorrect. Furthermore, we remind the reviewers that their IRSL results are not stratigraphically consistent; they suggest that the relatively younger T<sub>2</sub> fan was deposited BEFORE the older T<sub>1</sub> fan.

The unreliability of the IRSL-feldspar results is not surprising. The Klados catchment is small and the deposits are high-energy and close to the source with a significant amount of debris flow deposits. This is problematic for luminescence dating (and especially feldspar IRSL) because the environmental conditions are poor and incomplete bleaching before deposition is likely. This was a point raised by Gallen and Wegmann (2017) regarding the IRSL results present in Mouslopoulou et al. (2017), which the authors never adequately addressed.

The distributions of paleodoses from IRSL measurements support the notion that the results suffer

from incomplete bleaching since equivalent doses are widely scattered and show a skew towards younger ages. Mouslopoulou et al. (2017) acknowledge that their IRSL data suggest incomplete bleaching (quote: “This can indicate insufficient exposure of the sediment to daylight during the last sedimentation cycle.”). Perhaps most importantly, Mouslopoulou et al. (2017) state that they generated optically stimulated luminescence (OSL) results for quartz grains. However, they do not report these results, stating “In contrast, the investigated quartz from Domata showed poor luminescence properties: the OSL signals were dim, dose recovery tests yielded unsatisfactory results, the highly scattering palaeo-doses produced positively skewed broad distributions and the resulting quartz ages showed no relationship with stratigraphy (underestimation of true age).” Mouslopoulou et al., (2017) report the same behavior of broad and positively skewed equivalent dose distributions for their OSL measurements as for IRSL measurements. However, they chose to not publish the OSL results stating a “underestimation of true age”.

We emphasize that the arguments laid out in this quote used to rationalize not reporting the OSL results can equally apply to Mouslopoulou et al.’s (2017) IRSL results. We note that quartz bleaches faster than feldspar, and it is likely that the OSL results are better approximations of the depositional age of these Klados fans and terraces. However, we emphasize that the wide positively skewed scatter in OSL and IRSL measurements clearly points towards incomplete bleaching, which is also acknowledged in Mouslopoulou et al. (2017). The combination of younger OSL ages compared to IRSL, the broad skewed dose distributions for OSL and IRSL, and the poorly suitable depositional environment for luminescence burial dating indicate that the IRSL data reported by Mouslopoulou et al. (2017) are unreliable. We have added two paragraphs to the revised manuscript that discuss the points mentioned above in detail.

We also invite the authors of Mouslopoulou et al. (2017) to read the EGU21 abstract from Schwanghart et al. ([Abstract](#)). They perform luminescence dating on alluvial deposits in the Himalaya that are also related to upstream mass movements. They find that despite a transport distance significantly larger than in the Klados catchment, basically no bleaching of feldspar grains occurred during transport in the sediment laden floods and/or debris flows. We assume that the same applies to the feldspar grains measured by Mouslopoulou et al. (2017).

As noted in our manuscript, there is a great deal of uncertainty in our bulk radiocarbon ages. However, they are indeed consistent with the field observations and cross-cutting relationships that require most of the fan and terrace sequence to be Holocene. We consider this secondary evidence in support of the primary stratigraphic and cross-cutting relationships.

The reviewer brings up a good point that we clarify in the revision; the samples collected from T<sub>2</sub> and T<sub>1</sub> were from recently cut exposures well below the depth of soil, leaf litter, and rooting systems. So these sources of uncertainty for these deposits are small given our sampling approach. The landslide deposit consists of extremely weak material and clean, recent exposures were difficult to access. Because of this, we could not obtain samples from “ideal” locations, and we sampled the best locations possible. As such, it is possible that the samples acquired from the landslide deposit suffer from the sources of uncertainty mentioned above. We include a more

detailed discussion of these points in the revision.

We also want to use this as a chance to highlight that the absolute geochronology for deposits in Klados is a challenge and merits future work. That said, T<sub>2</sub> post-dates the Holocene erosional notch, so it is Holocene.

In lines 395-396 the authors state that “The deposition order obtained from the radiocarbon dating agrees with the sequence of events established in the field.” This statement is demonstrably incorrect, as further explored in their following sentences (396-404). Notably, the radiocarbon age for L1 is younger than those for T1 and T2, but the authors claim stratigraphic evidence that L1 pre-dates T1 and T2. By their own pen, the statement is clearly incorrect and should be removed from the manuscript.

This is a good point and we will revise the statements accordingly. However, we do discuss in detail on lines 397-400 of the original submission why these discrepancies likely exist. Furthermore, this mismatch highlights the importance of the relative age control that we establish and the cross-cutting relationships observed. These are the primary observations in the study and support our interpretations, the geochronology is supplementary, but helpful. We also note the geochronology of Mouslopoulou et al. (2017) is out of stratigraphic order, and the authors of that study seem comfortable with that when publishing their work.

The modified sentence reads as follows: “Except for one outlier, the deposition order obtained from the radiocarbon dating agrees with the sequence of events established in the field” (Table 1 and line 464-466).

**6.** Local soil development is highly variable and is influenced by a number of factors, including climate, parent material (including chemistry) and topography (Lin 2011). Thus, comparing soil development in Klados with areas such as Tsoutsouros in central southern Crete (130 km away) is risky. The Bt and Bk horizons in Tsoutsouros alluvial fans (Gallen et al. 2014) are about 2 m deep and similar horizons at Sfakia (20 km away) range from 5-16 cm (Pope et al. 2008; p 214, Section 7). A B horizon is present on the T1 fan surface at Klados but is limited in depth (Mouslopoulou et al. 2017).

Based on our own field observation, no B-horizon is present in the T<sub>1</sub> fan gravels. This was also evident in photos present in figures 8b and c in Mouslopoulou et al. (2017). The photo is annotated with “possible B horizon”, but there is no evidence of clay or calcium carbonate accumulation. The soils, or more accurately, the lack of soil development in the Klados fan deposits supports a young, likely Holocene age and the photos in Mouslopoulou et al. (2017) Figure 8 support the notion that they are immature relative to those developed on Pleistocene fans studied elsewhere on Crete.

We are well aware of the state factors that affect soil development including parent material, climate, topography, drainage, etc. The coastal climate of southern Crete is not substantially different from location to location and the fans described by Pope et al. (2008) and Gallen et al. (2014) are developed on similar alluvial fan material dominated by carbonate grains. However,

the soils are very different in these locations and support our interpretations. A key observation is that many (not all) Pleistocene fans composed of carbonate grains in Crete calcify quickly (see observations presented by the reviewers in the following comment). The Klados fans are almost entirely carbonate and are not cemented at all, in contrast to their Pleistocene counterparts. Indeed the images of the deposits in the following comment below show how different the Pleistocene-age deposits are near Aradena Gorge (~13 km east of Klados) relative to the Holocene features in Klados.

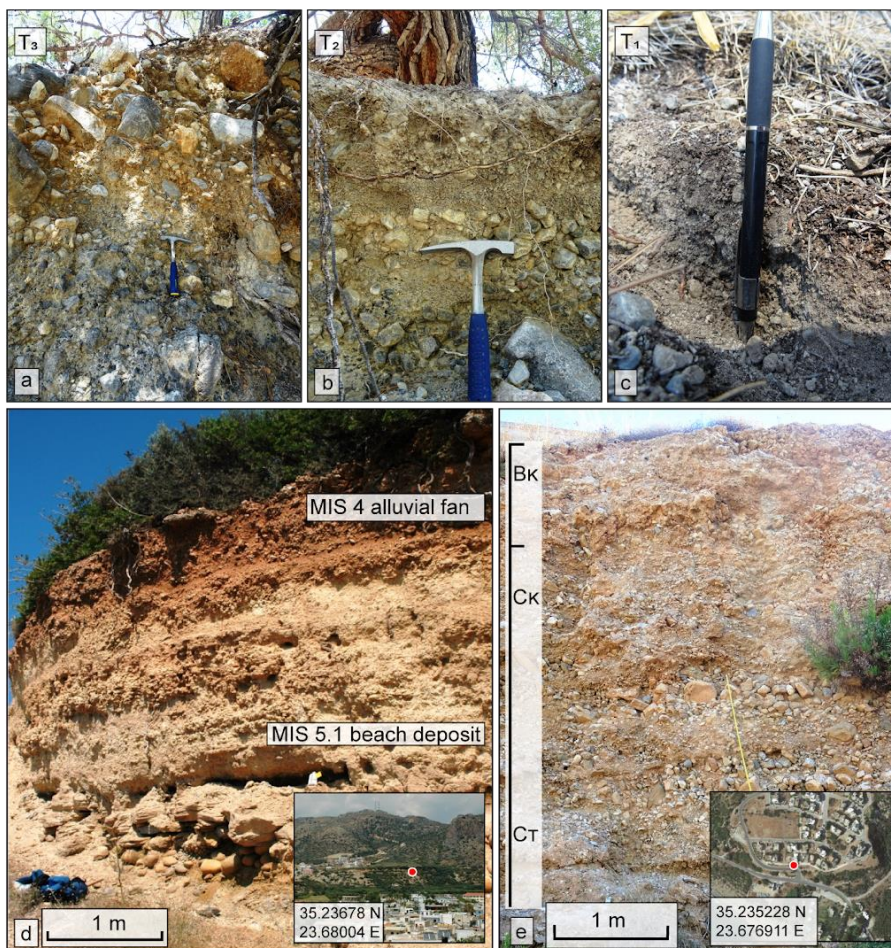

**Figure S5:** Minor soil development on T3 (a), T2 (b), and T1 (c) results in low soil maturity. Typically, a surface horizon of non-degraded organic matter such as pine needles overlies the original alluvial deposits. Soil formation may be accelerated in close proximity to larger plants such as pine trees, but we find no sign of wide-spread pedogenesis. (d) Outcrop “Alta Paleohora” (20 km W of Klados, exact location noted) showing dated MIS 4 alluvial fan material over MIS 5.1 beach deposits (Pope et al., 2008). (e) Outcrop in Paleohora (exact location noted), carbonaceous terrace of MIS 2. B = top soil, C = source rock, K= secondary carbonates, T = clay-enriched (IUSS Working Group WRB, 2015).

7. The manuscript interprets the presence of the double coastal sea cliff at Klados to result from deposition of a landslide and uplift associated with the AD365 earthquake. However, double (or even multiple) sea cliffs are present at different elevations in other coastal fan deposits along southern Crete that lack a landslide source for sediment supply. For example, west of Aradaina Gorge (Figure 2) these sea-trimmed fans are present along a 3 km length of the coastline.

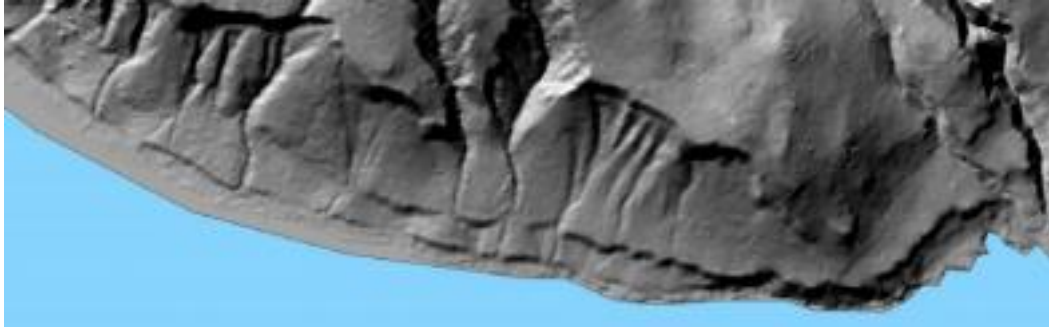

Scale bar 3 km long

**Figure 2:** Double sea-trimmed fans between Agia Roumeli and Aradaina Gorge, southwest Crete.

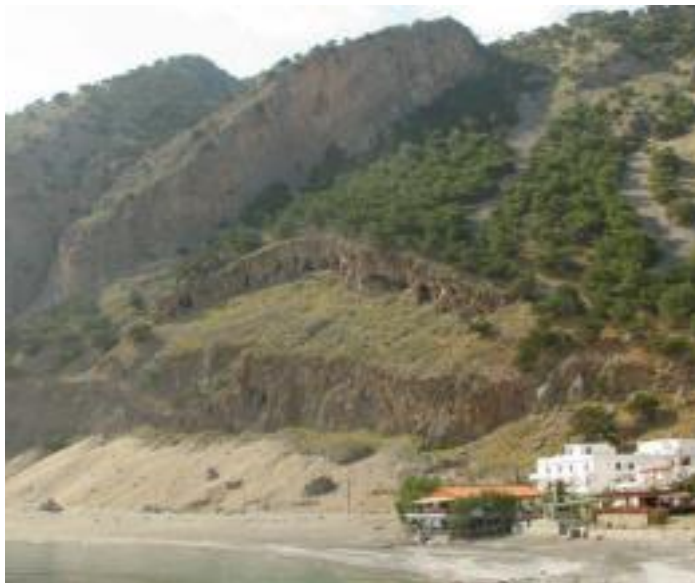

Similar twin sea cliffs, but at a higher elevation, are present at the settlement of Agia Roumeli, at the mouth of the Samaria Gorge (see Figure 3). Thus, the deposits/processes at Klados/Domata may not be as unique for Crete as the authors present (lines 106, 426, 429 and 503).

The south coast of Crete comprises marine terrace sequences with numerous paleoshorelines (e.g., Mouslopoulou et al., 2015; Ott et al., 2019). Sequences of sea cliffs are not unique to the Klados/Domata area and are not presented as such in the manuscript. We therefore did not make any modifications in response to this comment.

We also want to use this as an opportunity to highlight key observations that we made about the uniqueness of the Klados alluvial deposits; although it was not raised by the reviewer. Upvalley from Domata beach within the Klados catchment, the coastal fans are fluvial terraces (they are the same deposits) and extend nearly to the headwaters of the catchment. It is highly unusual in Crete or elsewhere to find an alluvial terrace in drainages this small, suggesting that the conditions in Klados are different than elsewhere. We note that Mouslopoulou et al. (2017) did not report observations of these terraces nor their upstream extent, but these deposits are essential to understanding the origins, history, and deposition of the coastal fans in much the same way the

landslide deposit is critical to understand why this small catchment is capable of generating such large alluvial deposits.

In summary, we are pleased that this paper provides new information on the likely presence of a landslide in the upper Klados catchment. The presence of this landslide and its deposits certainly raises the question whether stochastic events may account for geomorphology, erosion and deposition. However, due to the ambiguities associated with inconclusive stratigraphic and geochronological data identified above, this manuscript fails to prove its hypothesis that ‘the entire fan and terrace sequence’ (lines 22-24) at Klados is late Holocene in age. Thus, in this comment we question some of Bruni et al’s primary conclusions, despite the fact that they are presented with such certainty.

We thank the reviewers for their time in helping clarify points made regarding the Holocene age of the depositional feature in Klados. Their effort has strengthened our arguments. For that we are appreciative.

*Mouslopoulou, V., Begg, J., Fülling, A., Moraetis, D., Partsinevelos, P., and Oncken, O., 2017. Distinct phases of eustatic and tectonic forcing for late Quaternary landscape evolution southwest Crete, Greece. Earth Surface Dynamics 5, 1–17, <https://doi.org/10.5194/esurf-5-511-2017>, 2017.*

*Lin 2011, Three Principles of Soil Change and Pedogenesis in Time and Space. SSSAJ: Volume 75: Number 6.*

*Gallen, S.F., and Wegmann, K.W., 2017, Interactive comment on “Distinct phases of eustatism and tectonics control the Late Quaternary landscape evolution at the southern coastline of Crete” by Vasiliki Mouslopoulou et al.; Clarifying points on response of Mouslopoulou et al. to short comment by Gallen and Wegmann [30 January 2017]: Earth Surface Dynamics, <http://www.earth-surf-dynam-discuss.net/esurf-2016-62/esurf-2016-62-SC2-supplement.pdf>.*

*Gallen, S.F., and Wegmann, K.W., 2017, Interactive comment on “Distinct phases of eustatism and tectonics control the late Quaternary landscape evolution at the southern coastline of Crete” by Vasiliki Mouslopoulou et al. [8 January 2017]: Earth Surface Dynamics, <http://www.earth-surf-dynam-discuss.net/esurf-2016-62/esurf-2016-62-SC1-supplement.pdf>.*

### **References used in the responses by the authors**

Booth, J.: The response of Mediterranean steepland coastal catchments to base level and climate change, southwestern Crete, Aberystwyth University., 2010.

Gallen, S. F., Wegmann, K. W., Bohnenstiehl, D. R., Pazzaglia, F. J., Brandon, M. T. and Fassoulas, C.: Active simultaneous uplift and margin-normal extension in a forearc high, Crete, Greece, *Earth Planet. Sci. Lett.*, 398, 11–24, doi:10.1016/j.epsl.2014.04.038, 2014.

IUSS Working Group WRB: World Reference Base for Soil Resources 2014, update 2015: International soil classification system for naming soils and creating legends for soil maps., Rome.,

2015.

Mouslopoulou, V., Begg, J., Nicol, A., Oncken, O. and Prior, C.: Formation of Late Quaternary paleoshorelines in Crete, Eastern Mediterranean, *Earth Planet. Sci. Lett.*, 431, 294–307, doi:10.1016/j.epsl.2015.09.007, 2015.

Mouslopoulou, V., Begg, J., Fülling, A., Moraetis, D. and Partsinevelos, P.: Distinct phases of eustatic and tectonic forcing for late Quaternary landscape evolution in southwest Crete, Greece, *Earth Surf. Dyn.*, 5, 511–527, 2017.

Ott, R. F., Gallen, S. F., Wegmann, K. W., Biswas, R. H., Herman, F. and Willett, S. D.: Pleistocene terrace formation, Quaternary rock uplift rates and geodynamics of the Hellenic Subduction Zone revealed from dating of paleoshorelines on Crete, Greece, *Earth Planet. Sci. Lett.*, 525, 115757, doi:10.1016/j.epsl.2019.115757, 2019.

Pope, R., Wilkinson, K., Skourtsos, E., Triantaphyllou, M. and Ferrier, G.: Clarifying stages of alluvial fan evolution along the Sfakian piedmont, southern Crete: New evidence from analysis of post-incisive soils and OSL dating, *Geomorphology*, 94(1–2), 206–225, doi:10.1016/j.geomorph.2007.05.007, 2008.

Richardson, P. W., Perron, J. T. and Schurr, N. D.: Influences of climate and life on hillslope sediment transport, *Geology*, 47(5), 423–426, doi:10.1130/G45305.1, 2019.

Scherler, D., Lamb, M. P., Rhodes, E. J. and Avouac, J. P.: Climate-change versus landslide origin of fill terraces in a rapidly eroding bedrock landscape: San Gabriel River, California, *Bull. Geol. Soc. Am.*, 128(7), 1228–1248, doi:10.1130/B31356.1, 2016.

Schwanghart, W., Bernhardt, A., Stolle, A., Hoelzmann, P., Adhikari, B. R., Andermann, C., Tofelde, S., Merchel, S., Rugel, G., Fort, M. and Korup, O.: Repeated catastrophic valley infill following medieval earthquakes in the Nepal Himalaya, *Science* (80-. ), 351(6269), 147–150, doi:10.1126/science.aac9865, 2016.

Stolle, A., Bernhardt, A., Schwanghart, W., Hoelzmann, P., Adhikari, B. R., Fort, M. and Korup, O.: Catastrophic valley fills record large Himalayan earthquakes, Pokhara, Nepal, *Quat. Sci. Rev.*, 177, 88–103, doi:10.1016/j.quascirev.2017.10.015, 2017.
